# Supplementary material for: A 30 m annual cropland dataset of China from 1986 to 2021
Source: Copernicus journal article supplement (doi:10.5194/essd-2023-190), 2023-06-01
Supplement: Supplementary file 1 [file essd-2023-190-supplement.pdf]

Supplementary Information for

**A 30 m annual cropland dataset of China from 1986 to 2021**

**Table of contents**

Supplementary Figures S1-7.

Supplementary Tables S1-6.

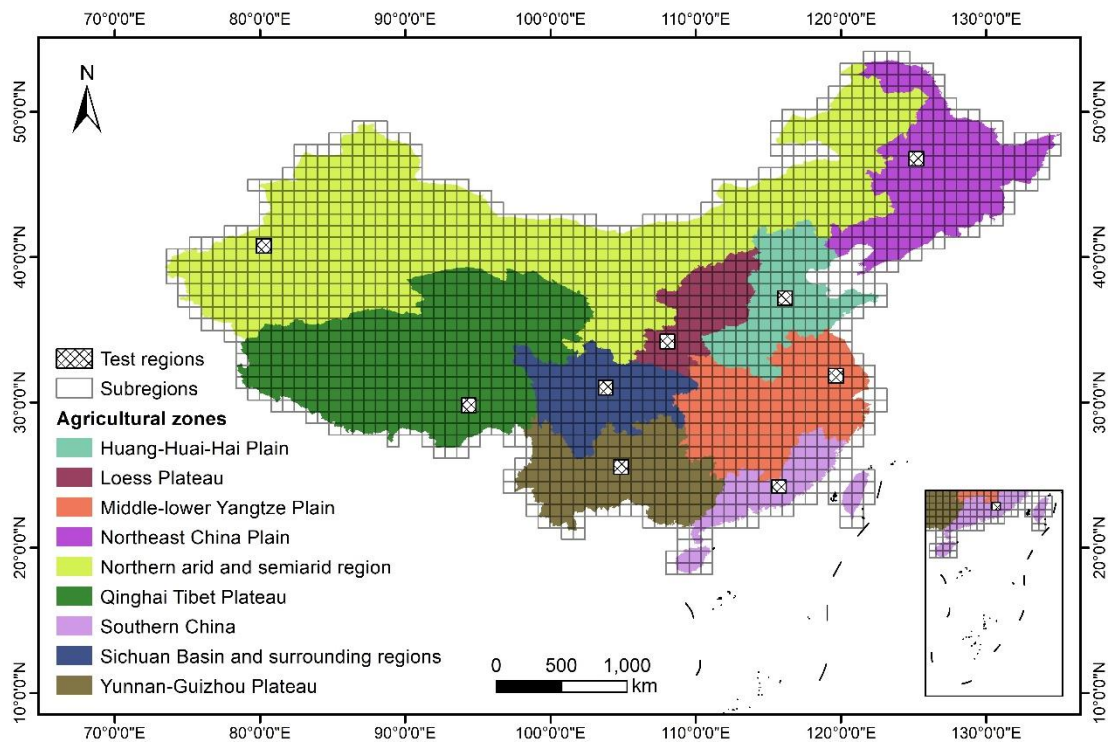

**Figure S1.** Divisions of the study area. Annual cropland classification is performed within each  $0.8^{\circ} \times 0.8^{\circ}$  subregion. Test regions with a size of  $100 \text{ km} \times 100 \text{ km}$  are used to find the best LandTrendr arguments for each agricultural zone.

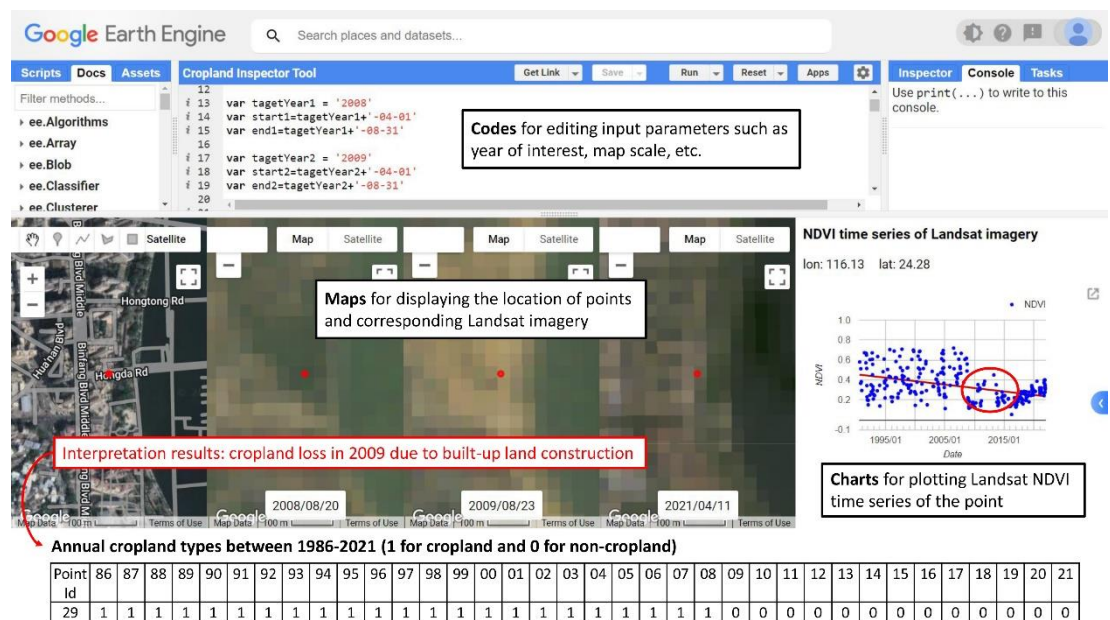

**Figure S2.** An example of the sample interpretation process using the developed Cropland Inspector Tool on © Google Earth Engine (<https://code.earthengine.google.com/616d493de325aaa5e3316a58ed8e7531>). The location was covered by croplands before 2009 but converted to built-up areas since then, of which changes were clearly shown in Landsat images and NDVI time series.

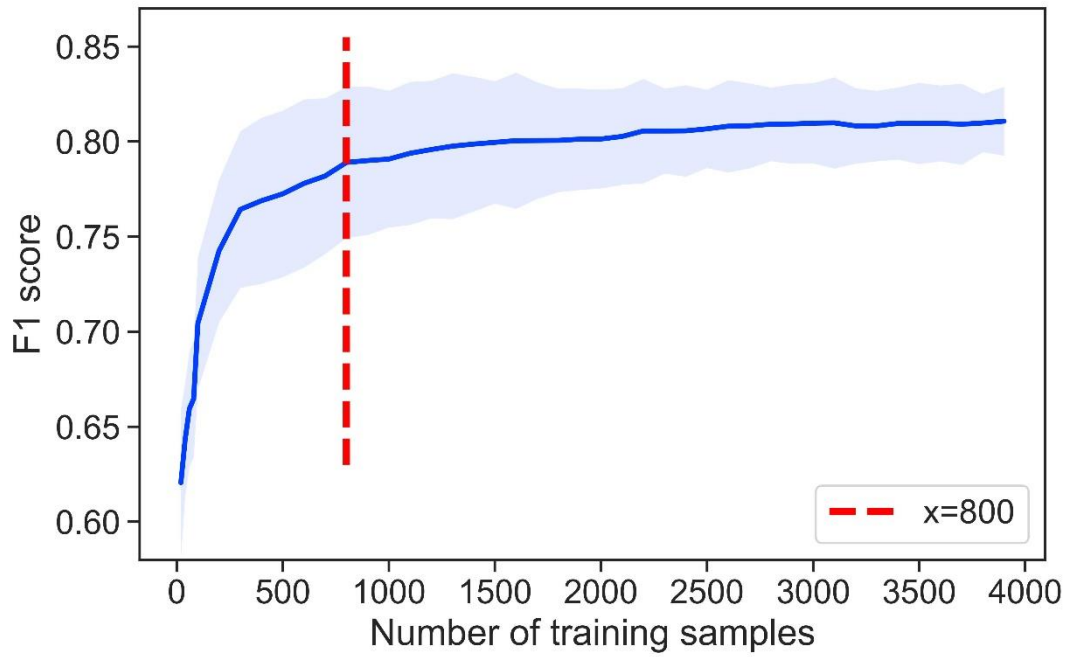

**Figure S3.** Mean F1 score of annual cropland classification results under different training sample sizes.

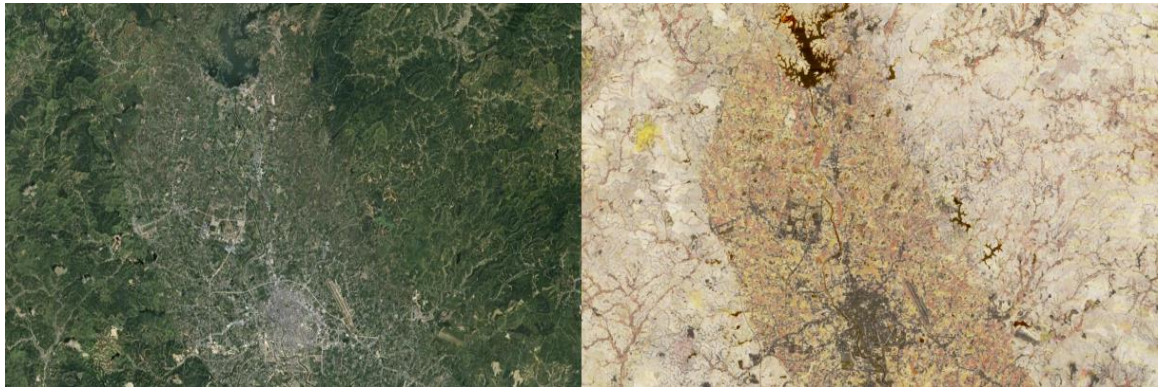

**Figure S4.** A comparison of a true color Landsat imagery displayed (left) and a corresponding NDVI composite imagery (with 10th, 50th, and 90th percent quantile of one-year values as the RGB channels) on the right. The Landsat imagery is provided by USGS with free access.

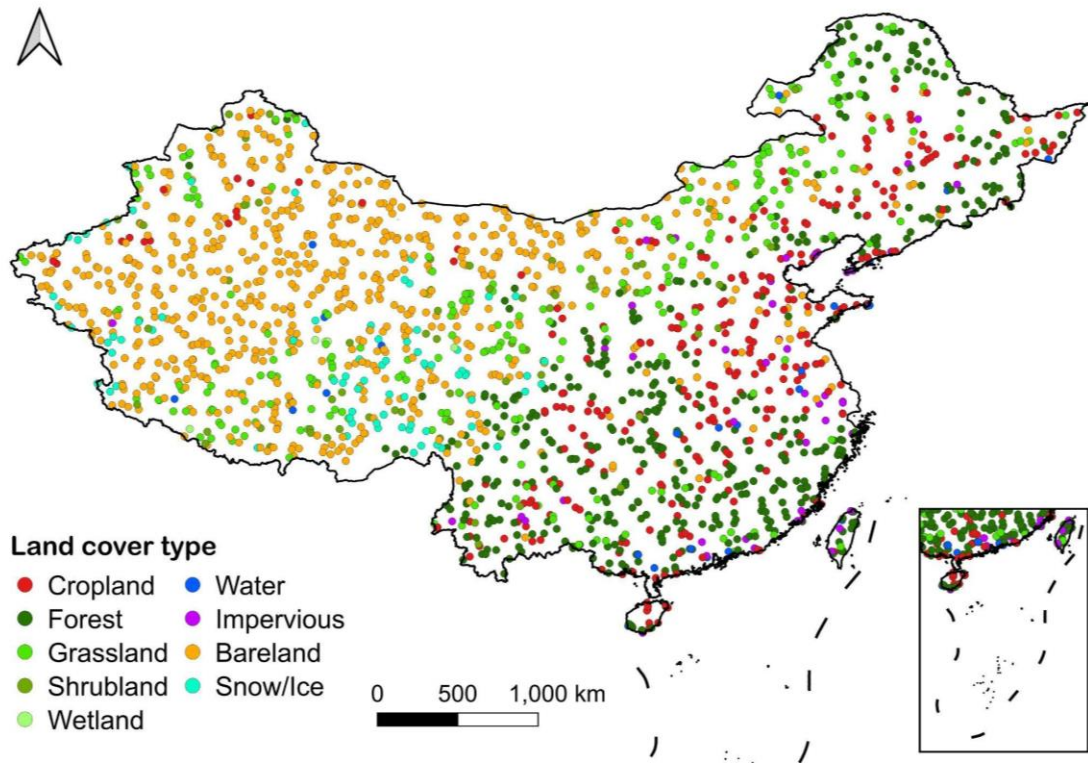

**Figure S5.** Distribution of global land cover validation sample set (GLCVSS) in China.

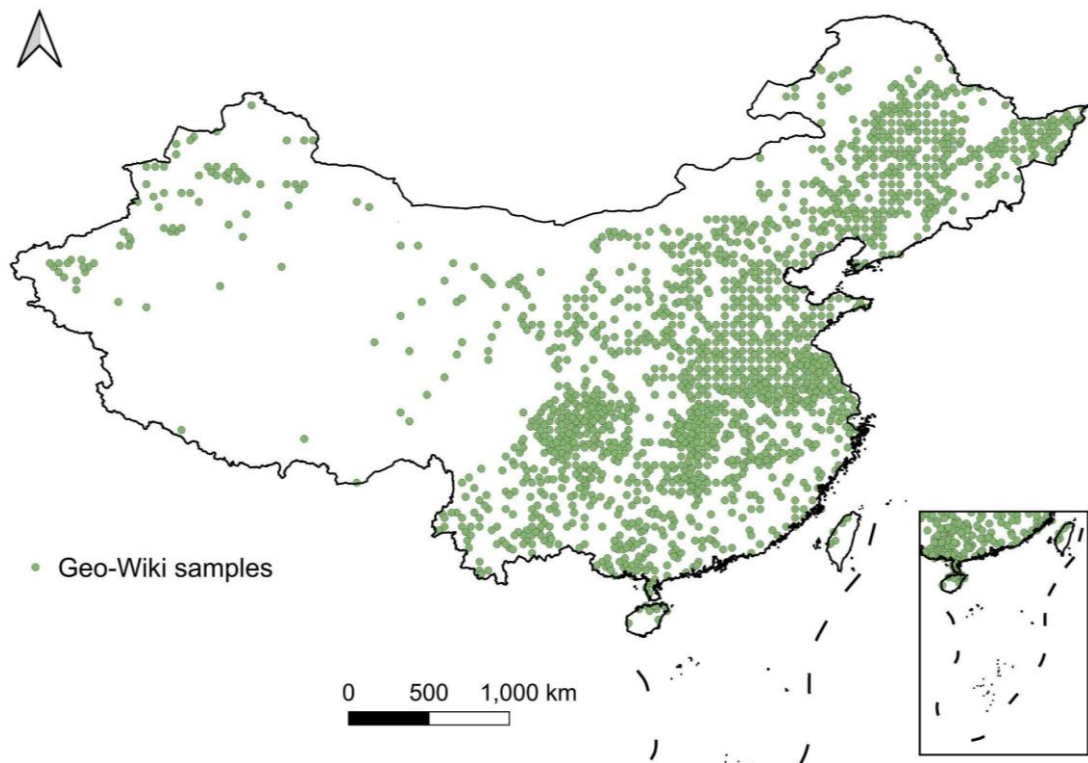

**Figure S6.** Distribution of GeoWiki cropland samples in China.

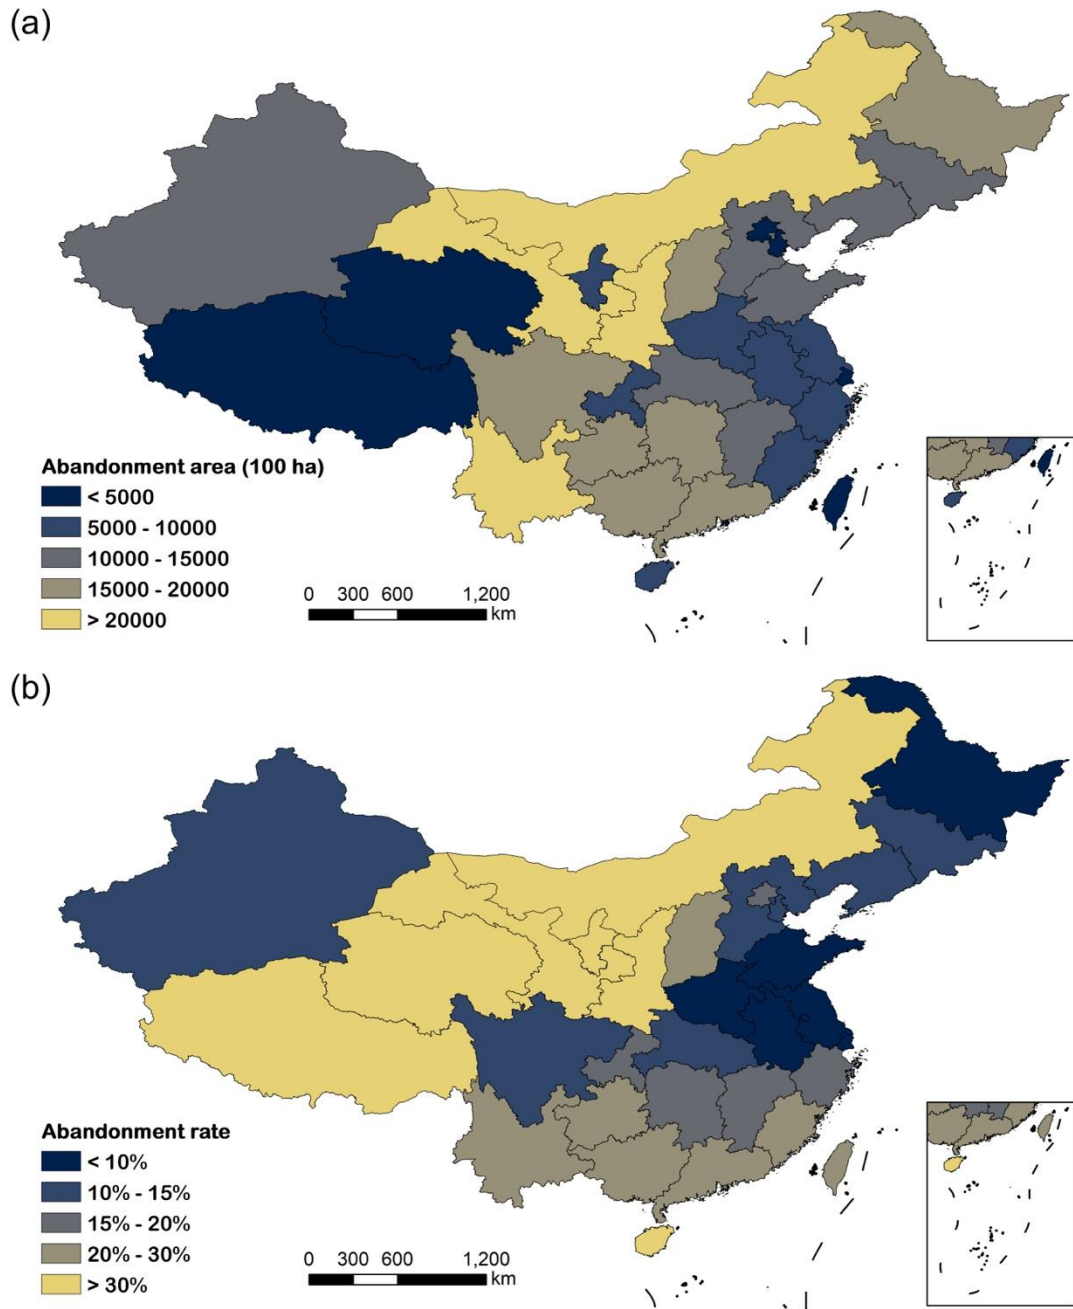

**Figure S7.** Provincial cropland abandonment in China between 1990-2015 of (a) area and (b) rate.

**Table S1.** A summary of the nine agricultural zones in China: their geographical and climatic conditions, growing seasons, cropping patterns, and major crops

| <b>Agricultural zones</b>             | <b>Geographical and climatic conditions</b>                                                                                                                                                                                                                                                      | <b>Growing seasons</b> | <b>Cropping patterns</b>  | <b>Major crops</b>                                                         |
|---------------------------------------|--------------------------------------------------------------------------------------------------------------------------------------------------------------------------------------------------------------------------------------------------------------------------------------------------|------------------------|---------------------------|----------------------------------------------------------------------------|
| Huang-Huai-Hai Plain                  | The largest alluvial plain of China being at the intersection of humid winds from the Pacific and dry winds from the interior of the Asian continent. Land is fertile and suitable for agricultural activity.                                                                                    | April to September     | Double cropping           | Wheat, maize, sorghum, millet, peanuts, sesame seed, cotton, apple, jujube |
| Loess Plateau                         | Has a continental monsoon climate. Winters are cold and dry, and most rainfall occurs during the summer. Annual precipitation is ~400 mm. Most areas are hills and plateaus covered by loess, with serious soil erosion.                                                                         | May to September       | Single cropping           | Maize, millet, corn, sorghum, apple                                        |
| Middle-lower Yangtze Plain            | Centered on the extensive lowland plains of east-central China. Experiences a temperate climate with warm springs, hot summers, cool autumns, and relatively cold winters for the latitude.                                                                                                      | April to October       | Tripple cropping          | Rice, maize, cotton, tea, rapeseed                                         |
| Northeast China Plain                 | Under the humid continental climate zone with a hot rainy summer and cold dry winter. Suitable for mechanized farming, with thick and fertile soil and extensive amounts of arable land.                                                                                                         | May to September       | Single cropping           | Maize, soybean, wheat, millet, sorghum, sugar beet                         |
| Northern arid and semiarid region     | Has an arid desert climate. Has abundant light energy resources and good heat conditions, but precipitation is low, and sandstorms and alkalization are severe                                                                                                                                   | June to September      | Single or double cropping | Wheat, melon, cotton, sugar beet                                           |
| Qinghai Tibet Plateau                 | Belongs to the alpine plateau climate. Covered mainly by plateaus and mountains with 4000 meters above sea level. Difficult for cereal planting and only suitable for grazing.                                                                                                                   | May to September       | Single cropping           | Wheat, highland barley, potatoes                                           |
| Sichuan Basin and surrounding regions | A lowland region in southwestern China. Experiences a subtropical monsoon climate with warm, hazy summers and chilly winter fog. Frost-free period is of 280-350 days.                                                                                                                           | April to October       | Double or triple cropping | Rice, wheat, maize, red sage, rapeseed                                     |
| Southern China                        | The only tropical economic crop planting area in the country. Experiences a subtropical and tropical climate with high temperatures and heavy rainfall particularly during the summer.                                                                                                           | March to October       | Triple cropping           | Rice, rubber, various tropical fruits                                      |
| Yunnan-Guizhou Plateau                | A large mountainous region with rugged terrain. Climate gradually transitions from drier in the southwest to rainier in the northeast - in east-central Yunnan, parts of the Yungui Plateau experience a semi-arid climate, while most of Guizhou is classified as the humid subtropical region. | March to October       | Double or triple cropping | Tobacco, tea, rubber, coffee                                               |

**Table S2.** Input features of multi-temporal metrics each year for the random forest classifier for estimating annual cropland probabilities.

| Category                            | Feature                                                                                                                                                                                                     | Description                                                                                                                                                                                                                                                                                                       | Dimension | Source  |
|-------------------------------------|-------------------------------------------------------------------------------------------------------------------------------------------------------------------------------------------------------------|-------------------------------------------------------------------------------------------------------------------------------------------------------------------------------------------------------------------------------------------------------------------------------------------------------------------|-----------|---------|
| Spectrum                            | 10 <sup>th</sup> , 25 <sup>th</sup> , 50 <sup>th</sup> , 75 <sup>th</sup> , and 90 <sup>th</sup> percent quantiles of Blue, Green, Red, NIR, SWIR1, and SWIR2 bands of both growing and non-growing seasons | Spectral bands of Landsat data                                                                                                                                                                                                                                                                                    | 6*5*2     | Landsat |
| Spectral indices                    | 10 <sup>th</sup> , 25 <sup>th</sup> , 50 <sup>th</sup> , 75 <sup>th</sup> , and 90 <sup>th</sup> percent quantiles of NDVI, NDSI, NDBI, NBR, and EVI indices of both growing and non-growing seasons        | Normalized indices derived from spectral bands, which are calculated as:<br>$NDVI = (NIR - Red) / (NIR + Red)$<br>$NDSI = (Green - SWIR1) / (Green + SWIR1)$<br>$NDBI = (SWIR1 - NIR) / (SWIR1 + NIR)$<br>$NBR = (NIR - SWIR1) / (NIR + SWIR2)$<br>$EVI = 2.5 * ((NIR - Red) / (NIR + 6 * Red - 7.5 * Blue + 1))$ | 5*5*2     | Landsat |
| Tasseled cap transformation indices | 10 <sup>th</sup> , 25 <sup>th</sup> , 50 <sup>th</sup> , 75 <sup>th</sup> , and 90 <sup>th</sup> percent quantiles of brightness, greenness, and wetness indices of both growing and non-growing seasons    | Tasseled cap transformation indices of spectral bands. Coefficients are derived from Crist (1985).                                                                                                                                                                                                                | 3*5*2     |         |
| Topography                          | Elevation                                                                                                                                                                                                   | /                                                                                                                                                                                                                                                                                                                 | 1         | SRTM    |

Noted NIR and SWIR are short for the near-infrared and short-wave bands of Landsat data respectively. NDVI, NDSI, NDBI, NBR, and EVI are abbreviations for the normalized difference vegetation index, the normalized difference snow index, the normalized difference built-up index, the normalized burn ratio, and the enhanced vegetation index, respectively.

**Table S3.** Ten settings of LandTrendr parameters tested in this study.

| Parameter                     | Settings |      |      |      |      |       |      |      |      |      |
|-------------------------------|----------|------|------|------|------|-------|------|------|------|------|
|                               | 1        | 2    | 3    | 4    | 5    | 6     | 7    | 8    | 9    | 10   |
| <i>maxSegments</i>            | 6        | 8    | 10   | 8    | 10   | 6     | 8    | 8    | 8    | 8    |
| <i>spikeThreshold</i>         | 0.9      | 0.9  | 0.9  | 0.5  | 0.5  | 0.9   | 0.9  | 0.9  | 0.9  | 0.9  |
| <i>preventOneYearRecovery</i> | TRUE     | TRUE | TRUE | TRUE | TRUE | FALSE | TRUE | TRUE | TRUE | TRUE |
| <i>recoveryThreshold</i>      | 0.25     | 0.25 | 0.25 | 0.25 | 0.25 | 0.25  | 0.5  | 0.75 | 0.25 | 0.25 |
| <i>pvalThreshold</i>          | 0.05     | 0.05 | 0.05 | 0.05 | 0.05 | 0.05  | 0.05 | 0.05 | 0.1  | 0.05 |
| <i>bestModelProportion</i>    | 0.75     | 0.75 | 0.75 | 0.75 | 0.75 | 0.75  | 0.75 | 0.75 | 0.75 | 0.5  |

Noted other parameters are set as default as those provided in <https://emapr.github.io/LT-GEE/lt-gee-requirements.html>.

**Table S4.** Annual cropland classification results for each agricultural zone under different LandTrendr parameter settings.

| Agricultural zone                     | Parameter settings with the highest F1 score | Statistics of F1 scores |      |      |
|---------------------------------------|----------------------------------------------|-------------------------|------|------|
|                                       |                                              | Highest                 | Mean | Std  |
| Huang-Huai-Hai Plain                  | 3                                            | 0.89                    | 0.87 | 0.01 |
| Loess Plateau                         | 4                                            | 0.83                    | 0.80 | 0.04 |
| Middle-lower Yangtze Plain            | 5                                            | 0.80                    | 0.80 | 0.02 |
| Northeast China Plain                 | 4                                            | 0.88                    | 0.87 | 0.01 |
| Northern arid and semiarid region     | 6                                            | 0.71                    | 0.62 | 0.06 |
| Qinghai Tibet Plateau                 | 8                                            | 0.67                    | 0.59 | 0.10 |
| Sichuan Basin and surrounding regions | 5                                            | 0.78                    | 0.76 | 0.02 |
| Southern China                        | 4                                            | 0.69                    | 0.65 | 0.06 |
| Yunnan-Guizhou Plateau                | 5                                            | 0.75                    | 0.71 | 0.04 |

Std: standard deviations.



**Table. S5.** Pixel-wise accuracy of CACD calculated based on the annual validation samples. F1: F1 score. OA: overall accuracy. Kappa: Kappa coefficient. UA: user’s accuracy. PA: producer’s accuracy.

| Year | F1        | OA        | UA        | PA        | Kappa     |
|------|-----------|-----------|-----------|-----------|-----------|
| 1986 | 0.76      | 0.91      | 0.77      | 0.75      | 0.70      |
| 1987 | 0.76      | 0.92      | 0.78      | 0.75      | 0.71      |
| 1988 | 0.77      | 0.92      | 0.78      | 0.75      | 0.71      |
| 1989 | 0.77      | 0.92      | 0.78      | 0.76      | 0.72      |
| 1990 | 0.76      | 0.92      | 0.78      | 0.75      | 0.71      |
| 1991 | 0.77      | 0.92      | 0.78      | 0.76      | 0.72      |
| 1992 | 0.78      | 0.92      | 0.78      | 0.77      | 0.73      |
| 1993 | 0.77      | 0.92      | 0.78      | 0.77      | 0.72      |
| 1994 | 0.78      | 0.92      | 0.78      | 0.77      | 0.73      |
| 1995 | 0.78      | 0.92      | 0.79      | 0.77      | 0.73      |
| 1996 | 0.78      | 0.92      | 0.79      | 0.77      | 0.73      |
| 1997 | 0.78      | 0.92      | 0.79      | 0.77      | 0.73      |
| 1998 | 0.78      | 0.92      | 0.79      | 0.78      | 0.74      |
| 1999 | 0.79      | 0.92      | 0.79      | 0.79      | 0.74      |
| 2000 | 0.79      | 0.93      | 0.79      | 0.80      | 0.75      |
| 2001 | 0.80      | 0.93      | 0.79      | 0.80      | 0.75      |
| 2002 | 0.79      | 0.92      | 0.79      | 0.80      | 0.75      |
| 2003 | 0.79      | 0.92      | 0.79      | 0.79      | 0.74      |
| 2004 | 0.79      | 0.93      | 0.79      | 0.80      | 0.75      |
| 2005 | 0.80      | 0.93      | 0.80      | 0.80      | 0.76      |
| 2006 | 0.80      | 0.93      | 0.80      | 0.81      | 0.76      |
| 2007 | 0.80      | 0.93      | 0.80      | 0.80      | 0.76      |
| 2008 | 0.80      | 0.93      | 0.80      | 0.81      | 0.76      |
| 2009 | 0.81      | 0.93      | 0.81      | 0.81      | 0.77      |
| 2010 | 0.81      | 0.93      | 0.80      | 0.82      | 0.77      |
| 2011 | 0.82      | 0.93      | 0.81      | 0.82      | 0.78      |
| 2012 | 0.82      | 0.94      | 0.81      | 0.83      | 0.78      |
| 2013 | 0.82      | 0.94      | 0.81      | 0.82      | 0.78      |
| 2014 | 0.82      | 0.94      | 0.82      | 0.82      | 0.78      |
| 2015 | 0.82      | 0.94      | 0.82      | 0.83      | 0.79      |
| 2016 | 0.81      | 0.93      | 0.80      | 0.82      | 0.77      |
| 2017 | 0.81      | 0.93      | 0.81      | 0.81      | 0.77      |
| 2018 | 0.81      | 0.93      | 0.81      | 0.81      | 0.77      |
| 2019 | 0.80      | 0.93      | 0.80      | 0.80      | 0.76      |
| 2020 | 0.80      | 0.93      | 0.80      | 0.80      | 0.76      |
| 2021 | 0.80      | 0.93      | 0.79      | 0.81      | 0.76      |
| Mean | 0.79±0.02 | 0.93±0.01 | 0.79±0.01 | 0.79±0.02 | 0.75±0.02 |

**Table. S6.** Accuracy of CACD for the year of change under different tolerance years.

| Tolerance (years) | Accuracy |
|-------------------|----------|
| 0                 | 0.76     |
| ±1                | 0.79     |
| ±2                | 0.81     |
| ±3                | 0.84     |
| ±4                | 0.86     |
| ±5                | 0.87     |

## References

Crist, E.P. (1985). A TM Tasseled Cap equivalent transformation for reflectance factor data. *Remote Sensing of Environment*, 17, 301-306
